## Outcomes of post mortem genetic diagnosis in SCD victims and primary prevention of cardiac arrest in relatives: a nationwide multidisciplinary and multicentric collaboration in the Czechia

Krebsova A.<sup>1</sup>; Votypka P.<sup>2</sup>; Peldova P.<sup>2</sup>; Rucklova K.<sup>3</sup>; Kulvajtova M.<sup>4</sup>; Pohlova -Kucerova S.<sup>5</sup>; Pilin A.<sup>6</sup>; Gregorova A.<sup>7</sup>; Tavacova T.<sup>8</sup>; Petrko-va J.<sup>9</sup>; Dobias M.<sup>10</sup>; Tomasek P.<sup>11</sup>; Macek Jr M.<sup>2</sup>; Janousek J.<sup>8</sup>; Kautzner J.<sup>1</sup>

<sup>1</sup>Institute for Clinical and Experimental Medicine (IKEM), Cardiology, Prague, Czechia

<sup>2</sup>Motol University Hospital, Institute of Biology and Medical Genetics, Prague, Czechia

<sup>3</sup>Faculty Hospital Kralovske Vinohrady, Paediatrics, Prague, Czechia

<sup>4</sup>Faculty Hospital Kralovske Vinohrady, Institute for Forensic Medicine, Prague, Czechia

<sup>5</sup>University Hospital Hradec Kralove, Department of Forensic Medicine, Hradec Kralove, Czechia

<sup>6</sup>Charles University of Prague, Institute for forensic medicine and toxicology, Prague, Czechia

<sup>7</sup>University Hospital Ostrava, Department of Biology and Medical Genetics, Ostrava, Czechia

<sup>8</sup>Motol University Hospital, Children's Heart Centre, Prague, Czechia

<sup>9</sup>University Hospital Olomouc, Department of Cardiology, Olomouc, Czechia

<sup>10</sup>University Hospital Olomouc, Institute of Forensic Science and Medical Law, Olomouc, Czechia

<sup>11</sup>Secon Faculty of Medicine, Hospital Bulovka, Institute for Forensic Medicine, Prague, Czechia

**Funding Acknowledgements:** Type of funding sources: Public grant(s) – National budget only. Main funding source(s): Supported by Ministry of Health of the Czech Republic

**Introduction:** Post mortem genetic analysis in sudden cardiac death (SCD) represents an important diagnostic tool for the primary prevention of cardiac arrest in victim's relatives.

**Purpose:** To assess the underlying molecular pathogenesis of SCD in a representative Czech cohort and to evaluate the effects of primary prevention of SCD in genetic relatives.

**Patients and Methods:** Between 2016 and 2020 we have ascertained 100 SCD cases (29 females/71 males; age range 0-52 years). According to autopsy protocols, cases with SCD were divided into categories of sudden arrhythmic death (SADS), sudden unexplained death (in infants; SUD/SUDI), thoracic aortic aneurysm/dissection and cardiomyopathy hypertrophic, arrhythmic, dilated (HCM, ACM, DCM) and sudden infant death syndrome (SIDS). DNA was isolated from post mortem biopsies / relatives blood and subjected to massively parallel sequencing (Illumina, USA) comprising custom-made candidate gene panel (100 genes). Genetic counselling and cardiological examinations were carried out in 245 family members.

**Results:** According to post mortem-established diagnosis, we identified 20 victims with SADS and SUD/SUDI, 11 with HCM and DCM, 19 with ACMG, 8 SIDS cases and 9 acute dissection cases. Most of victims died at sleep or at rest, while only 10/100 victims died during strenuous sport activities. About 50% of SCD victims did not report any apparent cardiac complaints. Highly likely or certain molecular etiology (i.e. based on presence of ACMG.net Class 4 to 5 variants) was disclosed in 19/100 (19%) in RYR2, KCNH2, SCN5A, FLNC (stop), TTN, RBM 20, LMNA/C, PRKAG2, MYBPC3, DSC2, FHL1, TGFBR1 and Col3A1 genes (see Tab). Finally, we identified 52/241 phenotype/genotype positive family members who are at risk of cardiac arrest and were offered corresponding cardiological care.

**Conclusion:** Multidisciplinary cooperation, together with centralized and standardized molecular genetic testing, enables the primary prevention of cardiac arrest in relatives of SCD victims.

### Results of post mortem genetic analysis

| Post mortem diagnosis | Nr. | Gender                | Age (years) | Nr. of positive cases (DNA variant class IV or V) | Gene                       | Nr. examined relatives/phenotype or genotype positive cases |
|-----------------------|-----|-----------------------|-------------|---------------------------------------------------|----------------------------|-------------------------------------------------------------|
| SADS                  | 20  | 8 females<br>12 males | 3-52        | 5/20 (25%)                                        | KCNH2 3x<br>RYR2<br>RANGFR | 56/11                                                       |
| SUD/SUDI              | 20  | 5 females, 15 males   | 0-50        | 1/18 (5%, 2 non informative cases)                | RYR2                       | 45/9                                                        |
| HCM                   | 11  | 0 females<br>11 males | 14-52       | 3/11 (27%)                                        | MYBPC3<br>FHL1<br>PRKAG2   | 26/9                                                        |

| Post mortem diagnosis | Nr. | Gender                | Age (years) | Nr. of positive cases (DNA variant class IV or V) | Gene                                   | Nr. examined relatives/phenotype or genotype positive cases |
|-----------------------|-----|-----------------------|-------------|---------------------------------------------------|----------------------------------------|-------------------------------------------------------------|
| DCM                   | 11  | 3 females<br>8 males  | 8-48        | 4/11 (36%)                                        | TTN (3x)<br>RBM 20<br>FLNC (stop)      | 24/7                                                        |
| ACM                   | 19  | 9 females<br>10 males | 17 - 49     | 4/19 (21%)                                        | SCN5A<br>FLNC (stop)<br>DSC2<br>LMNA/C | 58/9                                                        |
| SIDS                  | 8   | 3 females<br>5 males  | < 1         | 0/8                                               | -                                      | 12/0                                                        |
| Acute dissection      | 9   | 1 female<br>8 males   | 16-49       | 2/9 (22%)                                         | TGFBR1<br>Col3A1                       | 24/7                                                        |
